# Supplementary material for: Novel plant microRNAs from broccoletti sprouts do not show cross-kingdom regulation of pancreatic cancer
Source: PubMed Central journal article supplement (PMC7147085; doi:10.18632/oncotarget.27527), 2020-04-07
Supplement: oncotarget-11-1203-s001.pdf [file oncotarget-11-1203-s001.pdf]

## Novel plant microRNAs from broccoletti sprouts do not show cross-kingdom regulation of pancreatic cancer

### SUPPLEMENTARY MATERIALS

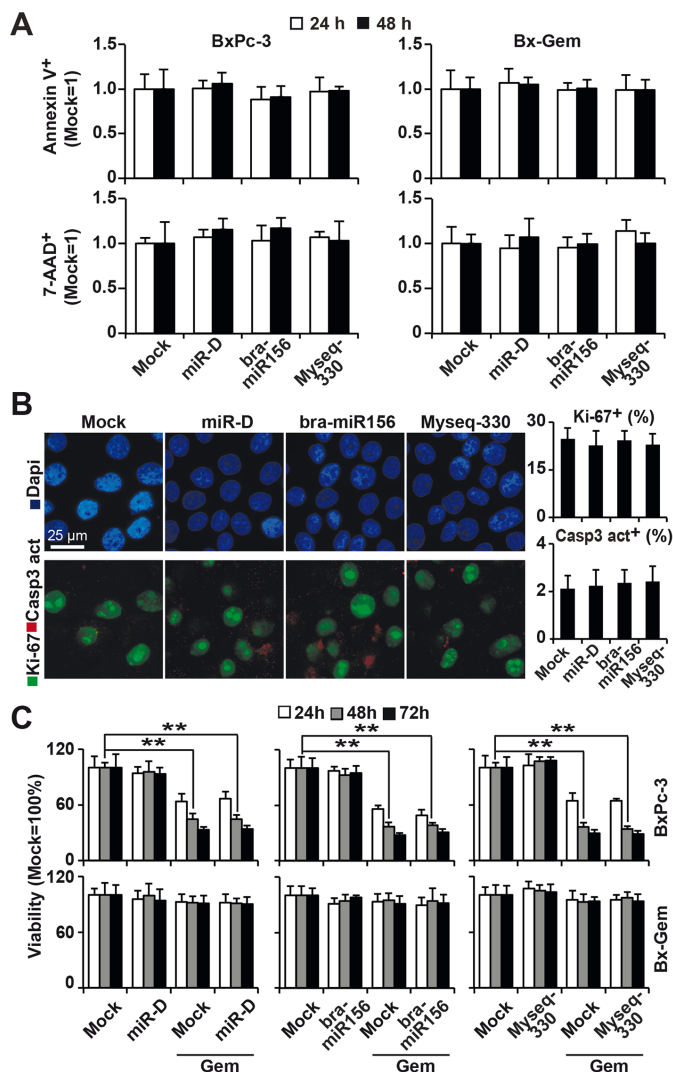

#### Supplementary Figure 1: Lipofection of top broccoletti-miR candidates does not influence basal and induced apoptosis.

BxPc-3 and Bx-Gem cells were lipofected with bra-miR156g-5p, Myseq-330, miR-D (50 nM each), or a miR-NG oligonucleotide (50 nM), which served as a mock control. (A) Twenty-four and forty-eight hours later, the cells were stained with Annexin V-PE and 7-AAD, followed by FACS analysis. The percentage of Annexin V- and 7-AAD-positive cells is shown. (B) Forty-eight hours after transfection, the BxPc-3 and Bx-Gem cells were stained with an antibody specific for the proliferation marker “Ki-67” (green) or the apoptosis marker “cleaved fragment of caspase-3” (red), which indicates apoptosis. Representative images at  $\times 100$  magnification are shown. The percentage of Ki-67- or caspase-3-positive cells was counted in 18 visual fields, and the means  $\pm$  SD are shown in the diagram below. (C) BxPc-3 and Bx-Gem were lipofected as described above, and 24 h later, the cells were treated with gemcitabine (10 nM) or were left untreated. Twenty-four, forty-eight or seventy-two hours after gemcitabine treatment, the viability was determined by MTT assay. The data are presented as the means  $\pm$  SD (\*\* $P < 0.01$ ).

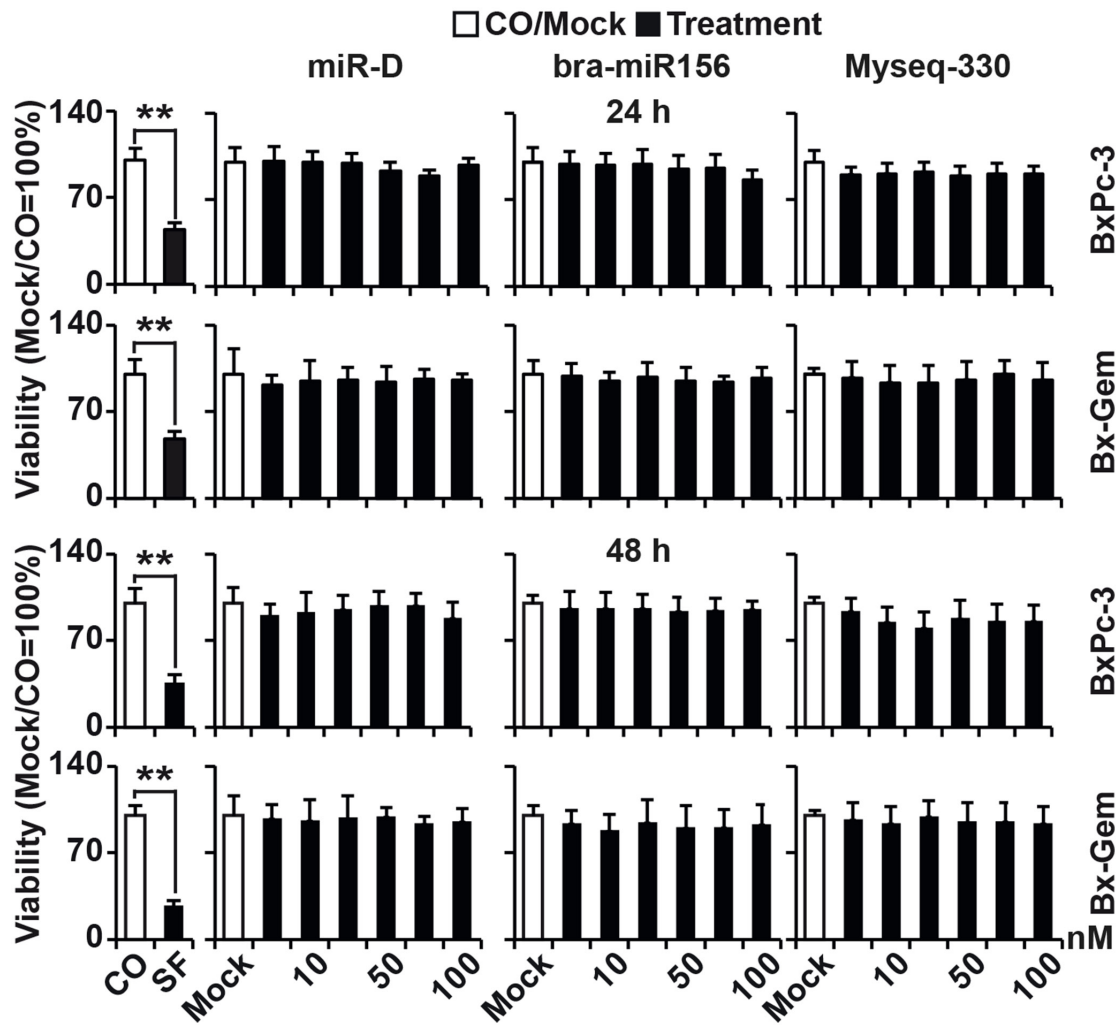

Supplementary Figure 2: Lipofection of the top broccoli-miR candidates does not affect viability. The cells were treated and analysed as described in Figure 4 and time points are indicated.

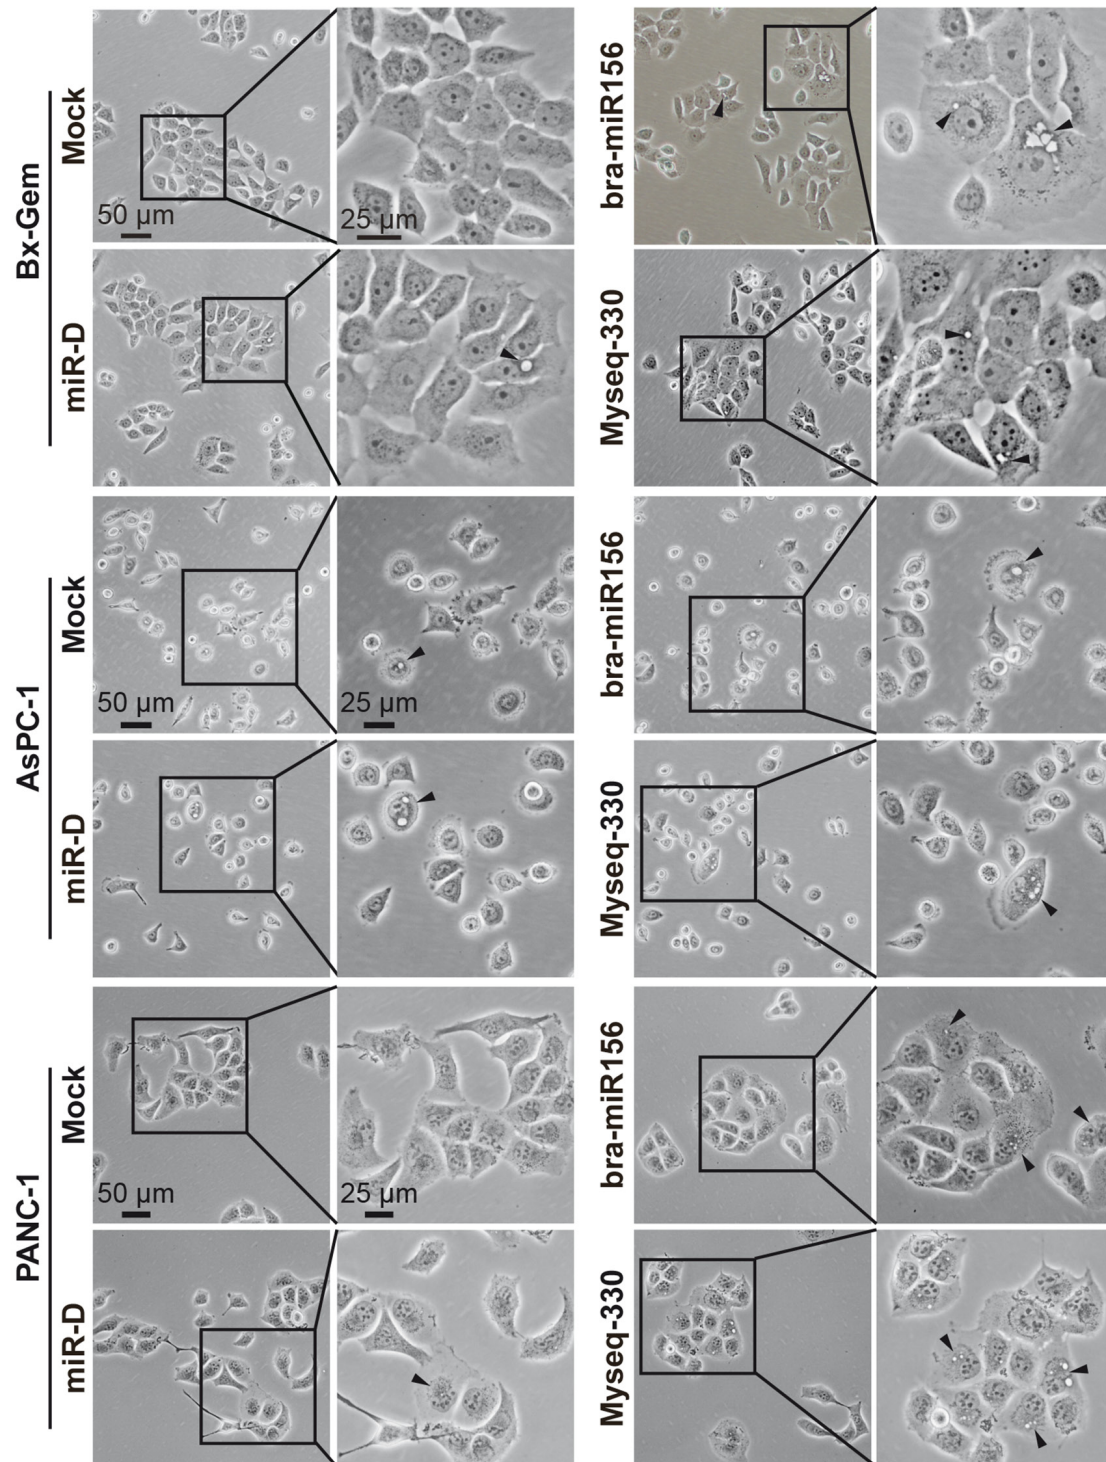

**Supplementary Figure 3: Lipofection of the top broccoli-miR candidates does not affect morphology.** The morphology of Bx-Gem, AsPC-1 and PANC-1 cells was photographed at 24 h after lipofection as described in Figure 4. The arrows indicate apoptotic blebbing.

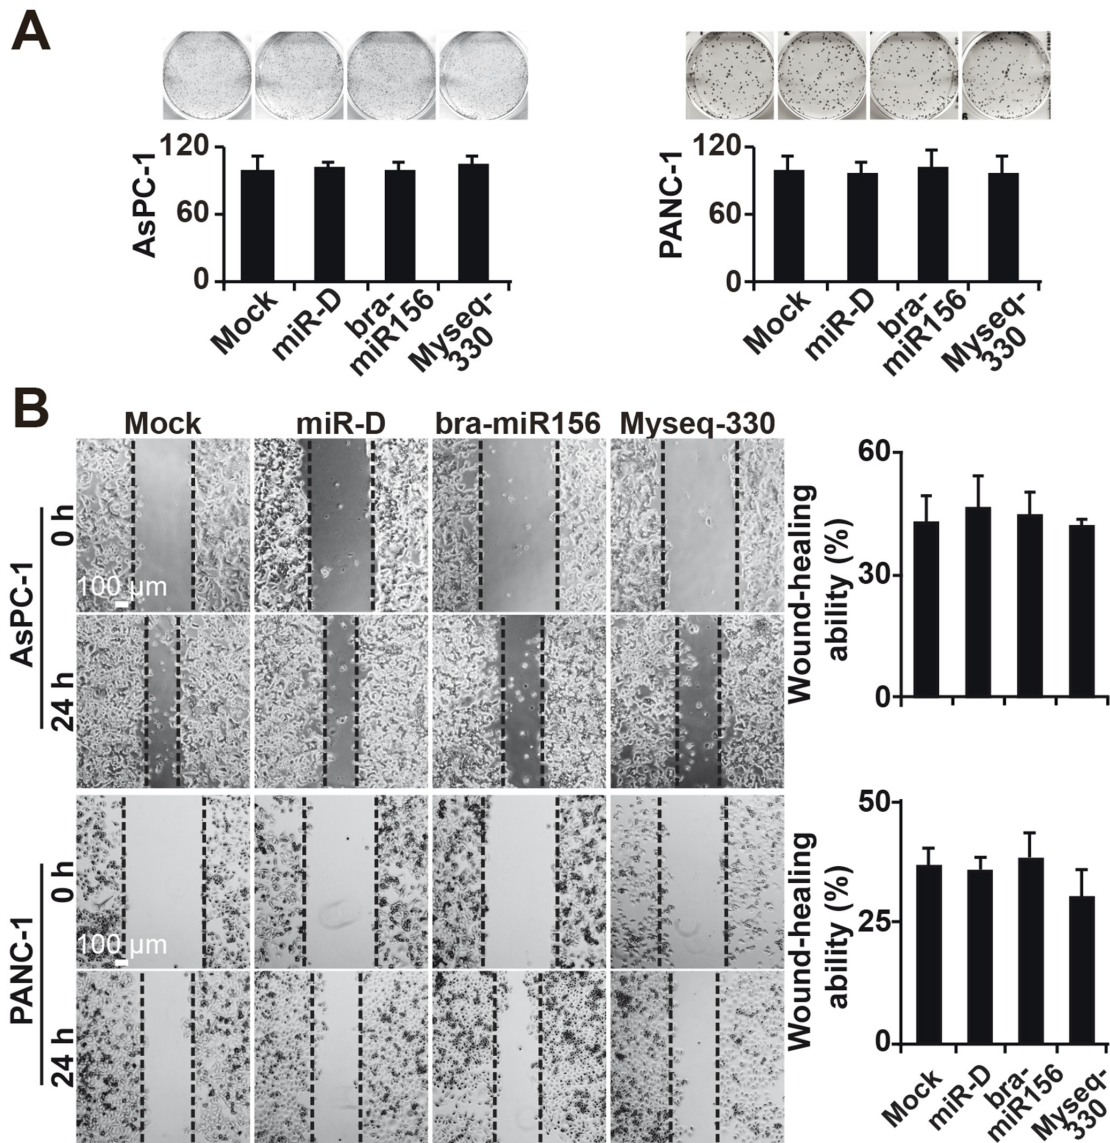

**Supplementary Figure 4: Lipofection of the top broccoli-miR candidates does not affect clonogenicity and migration.** The AsPC-1 and PANC-1 cells were treated and analysed as described in Figure 5. The (A) colony-forming assays and (B) scratch assays were examined, as indicated.

**Supplementary Table 1: List of broccoletti sprout-derived miRs (broccoletti-miRs).** See Supplementary Table 1

**Supplementary Table 2: List of human targets of broccoletti-miRs.** See Supplementary Table 2

**Supplementary Table 3: Significant pathways suggested to be regulated by broccoletti-miRs.** See Supplementary Table 3

**Supplementary Table 4: Sulforaphane-related genes**

| <b>Pathway</b>                  | <b>Gene name</b>                                                                                                   |
|---------------------------------|--------------------------------------------------------------------------------------------------------------------|
| Angiogenesis                    | HIF1A, KDR, MYC, VEGF                                                                                              |
| Apoptosis                       | AKT1, AR, ATG5, BAX, BCL2, CASP3, CASP8, CASP9, FOXO1, FOXO3, FOXO4, HDAC6, PARP, TP53, XIAP                       |
| Cell cycle                      | CCND1, CDK4, CDK6, CDKN1A, CDKN1B, CHK2, MAPK1, MAPK3, PI3K                                                        |
| Phase I enzymes                 | CYP1A1, CYP1B1, CYP2E1, CYP3A4                                                                                     |
| Phase II enzymes                | GSTA1, GSTM1, GSTT1, NRF2, UGT1A1, UGT1A8, UGT1A10                                                                 |
| Self-renewal and CSC characters | ALDH1, CTNNB1, Gli1, Gli2, IL6R, MMP7, NANOG, NOTCH1, OCT4, PDGFR $\alpha$ , POU5F1, REL, SMO, STAT3, TWIST1, ZEB1 |
| Others                          | GJA1, HSP90                                                                                                        |

Genes were identified by literature search and grouped according to their biological function.
